# Supplementary material for: Key determinants of health and wellbeing of dental nurses: a rapid review of over two decades of research
Source: Research Square preprint supplement (doi:10.21203/rs.3.rs-3792798/v1), 2024-01-09
Supplement: Supplementary file 1 [file 11e71af1bd0d13bfdc192bb4.pdf]

### Appendix 3

**Table 4 Key Determinants of Dental Nurses' Health and Well-being of Included Studies**

|                                        |                                                                                                  | Micro level factors                                         |                                                                 |                                     | Meso level factors                 |                                                                                                | Macro level factors            |            |            |
|----------------------------------------|--------------------------------------------------------------------------------------------------|-------------------------------------------------------------|-----------------------------------------------------------------|-------------------------------------|------------------------------------|------------------------------------------------------------------------------------------------|--------------------------------|------------|------------|
| Study Author/<br>Date                  | Professional<br>group                                                                            | Personal<br>Factors                                         | Professional/<br>Social<br>relationships                        | Professional<br>Career<br>Level     | Job<br>Specification               | Workplace<br>Characteristic                                                                    | Dental<br>Healthcare<br>System | Regulation | Profession |
| Yousra H.AL<br>JAZAIRY et al.,<br>2014 | Dental assistants                                                                                | Females<br>satisfied<br>compared to<br>men                  | satisfied with<br>their<br>professional<br>and personal<br>life | degree<br>linked to<br>satisfaction | Satisfied<br>assisting<br>dentists | Those in private<br>practice and<br>those working<br>less were more<br>satisfied               | Low income                     |            |            |
| AL-OMOUSH,<br>S et al., 2019           | Dentists, dental<br>technicians, and<br>dental assistants                                        | Hearing<br>affected by<br>age                               |                                                                 |                                     |                                    | Dental<br>Assistants had<br>poorer hearing<br>in left ear                                      |                                |            |            |
| ALANKO, K et<br>al., 2004              | Dental nurses                                                                                    |                                                             |                                                                 |                                     |                                    | Occupational<br>hazard-<br>dermatoses                                                          |                                |            |            |
| ALZAHM, A<br>et al., 2020              | Dentists, dental<br>assistants, Lab<br>technicians and<br>dental<br>hygienists                   | Burnout<br>linked to<br>age, sex, and<br>marital<br>status. |                                                                 | Low<br>accomplish<br>ments          |                                    |                                                                                                |                                |            |            |
| AZODO, C et<br>al., 2011               | Dentists, dental<br>nurses, dental<br>technologists,<br>dental<br>therapists,<br>record officers |                                                             |                                                                 |                                     |                                    | Workplace<br>violence linked<br>to long waits,<br>cancellations,<br>intoxication,<br>and bills |                                |            |            |

|                                    |                                                                                 | Micro level factors                                                          |                                                                               |                                 | Meso level factors                                                             |                                                                                               | Macro level factors            |            |            |
|------------------------------------|---------------------------------------------------------------------------------|------------------------------------------------------------------------------|-------------------------------------------------------------------------------|---------------------------------|--------------------------------------------------------------------------------|-----------------------------------------------------------------------------------------------|--------------------------------|------------|------------|
| Study Author/<br>Date              | Professional<br>group                                                           | Personal<br>Factors                                                          | Professional/<br>Social<br>relationships                                      | Professional<br>Career<br>Level | Job<br>Specification                                                           | Workplace<br>Characteristics                                                                  | Dental<br>Healthcare<br>System | Regulation | Profession |
| GOETZ, K et<br>al., 2016           | Dental nurses                                                                   |                                                                              | Satisfied with<br>colleagues                                                  | long length<br>of<br>employment | Clear<br>responsibility<br>within team                                         | Satisfied by job<br>variety, working<br>less linked to<br>improved well<br>being              |                                |            |            |
| BANAKAR, M.<br>et al., 2023        | Dentists, dental<br>hygienists,<br>dental<br>assistants, and<br>dental students | COVID-19<br>anxiety                                                          |                                                                               |                                 |                                                                                | Consecutive<br>shifts and<br>assistants linked<br>to high PTSD<br>symptoms                    |                                |            |            |
| DAJPRATHA<br>M, P. et al.,<br>2010 | Clinical<br>instructors,<br>postgraduate<br>students and<br>dental assistants   |                                                                              |                                                                               |                                 |                                                                                | Occupational<br>hazard-<br>musculoskeletal<br>problems like<br>pain, which<br>affected health |                                |            |            |
| DREHER, A. et<br>al., 2021         | Dental assistants                                                               | Old age was<br>linked to<br>increase in<br>perceived<br>risk of<br>infection | Family with<br>the virus was<br>linked to<br>feeling PPE<br>was<br>inadequate |                                 | Lack of<br>information<br>and<br>preparation<br>during Covid-<br>19            | Increased risk of<br>COVID-19, lack<br>of PPE,<br>Financial<br>uncertainty<br>during Covid-19 |                                |            |            |
| FREEMAN, R.<br>et al., 2021        | Dental trainees<br>and primary<br>dental care staff                             | Depressive<br>symptoms<br>were less<br>emotional<br>exhausted                |                                                                               |                                 |                                                                                | High quality<br>service linked to<br>emotional<br>fatigue                                     |                                |            |            |
| GNICH, W. et<br>al., 2014          | Extended duty<br>dental nurses                                                  |                                                                              |                                                                               |                                 | Extended duty<br>dental nurses<br>(EDDNs)<br>were satisfied<br>with their role | Barriers and<br>facilitators of<br>duties                                                     |                                |            |            |

|                               |                                                                                    | Micro level factors                                 |                                                    |                                 | Meso level factors   |                                                                                                  | Macro level factors                                                |                                      |                                                                   |
|-------------------------------|------------------------------------------------------------------------------------|-----------------------------------------------------|----------------------------------------------------|---------------------------------|----------------------|--------------------------------------------------------------------------------------------------|--------------------------------------------------------------------|--------------------------------------|-------------------------------------------------------------------|
| Study Author/<br>Date         | Professional<br>group                                                              | Personal<br>Factors                                 | Professional/<br>Social<br>relationships           | Professional<br>Career<br>Level | Job<br>Specification | Workplace<br>Characteristics                                                                     | Dental<br>Healthcare<br>System                                     | Regulation                           | Profession                                                        |
| HAKANEN, J.<br>et al., 2014   | Dentist/nurse<br>dyads                                                             |                                                     | Friendly<br>dentists-to<br>exhaustion in<br>nurses |                                 |                      |                                                                                                  |                                                                    |                                      |                                                                   |
| HAMASHA, A.<br>et al., 2019   | Dentist, dental<br>assistant,<br>hygienists,<br>dental lab tech                    | Non-Saudis<br>were more<br>satisfied<br>than Saudis |                                                    |                                 |                      | Quality of<br>service linked to<br>satisfaction                                                  | Low<br>satisfaction<br>with income                                 |                                      |                                                                   |
| HILT, B. et al.,<br>2009      | Dental assistants                                                                  |                                                     |                                                    |                                 |                      | Cognitive effect<br>from<br>occupational<br>exposure to<br>mercury                               |                                                                    |                                      |                                                                   |
| HUMPHRIS, G.<br>et al., 2021  | Vocational<br>dentist, therapist<br>hygienist,<br>Trainee Nurses,<br>dental nurses | Emotional<br>exhaustion                             |                                                    |                                 |                      | Some primary<br>care staff were<br>not prepared to<br>take care of<br>their health and<br>stress | Financial<br>concerns for<br>practice<br>owners due<br>to Covid-19 | Lack of<br>control of<br>redeploying | Anxiety and<br>sadness from<br>low<br>professional<br>recognition |
| JAAKKOLA,<br>M. et al., 2007  | Dental assistants                                                                  | Atopic<br>disease                                   |                                                    |                                 |                      | Exposure to<br>methacrylate at<br>work                                                           |                                                                    |                                      |                                                                   |
| KHADER, Y.<br>S. et al., 2009 | Dental assistants                                                                  |                                                     |                                                    |                                 |                      | Fairly satisfied<br>with their job                                                               |                                                                    |                                      |                                                                   |
| KIRLI, M. &<br>KIRLI U., 2021 | Dentists, nurses,<br>data<br>entry/cleaning<br>staff                               |                                                     |                                                    |                                 |                      | Increased<br>anxiety<br>restarting<br>procedures                                                 |                                                                    |                                      |                                                                   |
| KOTHA, S. B.<br>et al., 2023  | Dental assistants                                                                  | Depressive<br>symptoms                              |                                                    |                                 |                      | Work was<br>challenging<br>during the<br>Covid-19<br>pandemic                                    |                                                                    |                                      |                                                                   |

|                                |                                                                              | Micro level factors                                                  |                                                                               |                                                                                      | Meso level factors                                                                              |                                                                        | Macro level factors              |            |                                                  |
|--------------------------------|------------------------------------------------------------------------------|----------------------------------------------------------------------|-------------------------------------------------------------------------------|--------------------------------------------------------------------------------------|-------------------------------------------------------------------------------------------------|------------------------------------------------------------------------|----------------------------------|------------|--------------------------------------------------|
| Study Author/<br>Date          | Professional<br>group                                                        | Personal<br>Factors                                                  | Professional/<br>Social<br>relationships                                      | Professional<br>Career<br>Level                                                      | Job<br>Specification                                                                            | Workplace<br>Characteristics                                           | Dental<br>Healthcare<br>System   | Regulation | Profession                                       |
| LINDFORS, P.<br>et al., 2006   | Dentists, dental<br>hygienists, and<br>dental nurses                         | General<br>health<br>problems,<br>increasing<br>age linked to<br>UED |                                                                               |                                                                                      |                                                                                                 | UED linked to<br>poor physical,<br>psychosocial<br>work<br>environment |                                  |            |                                                  |
| MAHENDRAN<br>, K. et al., 2020 | Administrative,<br>dental nurses,<br>dental<br>technicians, and<br>dentists  | Fears of the<br>virus on<br>personal<br>health, high<br>anxiety      | Self-isolation<br>from family<br>and social<br>distancing due<br>to Covid -19 | Uncertainty<br>of impact of<br>Covid -19 on<br>training and<br>career<br>progression | Changing<br>work patterns,<br>outside scope,<br>and higher risk<br>settings due to<br>Covid -19 | PPE scarcity                                                           |                                  |            |                                                  |
| MEKHEMAR,<br>M. et al., 2021   | Dental nurses                                                                | Psychologic<br>al impact of<br>pandemic                              | Lower anxiety<br>in single<br>people                                          |                                                                                      |                                                                                                 | Private clinic<br>higher<br>psychological<br>impact                    |                                  |            |                                                  |
| MINAMOTO,<br>K. et al., 2012   | Dentists,<br>hygienists,<br>technicians,<br>assistants, and<br>receptionists | Young age<br>linked to<br>eczema                                     |                                                                               |                                                                                      |                                                                                                 | Occupational<br>Hazard –<br>Eczema                                     |                                  |            |                                                  |
| NAIDU, R. et<br>al., 2006      | Therapists-UK,<br>NZ<br>dental nurses-<br>T&T                                |                                                                      |                                                                               |                                                                                      |                                                                                                 | Lowest job<br>satisfaction in<br>nurses-Trinidad<br>and Tobago         |                                  |            |                                                  |
| NAIDU, R. S. et<br>al., 2002   | Dental nurse                                                                 | Career<br>breaks due<br>to family<br>reasons                         | Childcare<br>responsibility                                                   | Unsatisfied<br>by career<br>development                                              |                                                                                                 | Job satisfaction<br>linked to<br>unsatisfactory<br>work conditions     | Confused<br>about<br>legislation |            | Dissatisfied<br>with CEs<br>available to<br>them |
| PARTIDO, B.<br>et al., 2020    | Dentists and<br>dental assistants                                            |                                                                      |                                                                               |                                                                                      |                                                                                                 | Poor<br>ergonomics was<br>linked to<br>muscular pain                   |                                  |            |                                                  |

|                               |                                                                                 | Micro level factors                                       |                                                          |                                 | Meso level factors                                            |                                                                                  | Macro level factors                     |                                           |                                                           |
|-------------------------------|---------------------------------------------------------------------------------|-----------------------------------------------------------|----------------------------------------------------------|---------------------------------|---------------------------------------------------------------|----------------------------------------------------------------------------------|-----------------------------------------|-------------------------------------------|-----------------------------------------------------------|
| Study Author/<br>Date         | Professional<br>group                                                           | Personal<br>Factors                                       | Professional/<br>Social<br>relationships                 | Professional<br>Career<br>Level | Job<br>Specification                                          | Workplace<br>Characteristics                                                     | Dental<br>Healthcare<br>System          | Regulation                                | Profession                                                |
| PLESSAS, A. et al., 2021      | Dentists and dental nurses                                                      |                                                           | UDCs strengthened working relationship                   |                                 |                                                               | Using strategies to maximize efficiency during Covid-19 challenges               | Undervalued and ignored during COVID-19 | Worries about litigation in covid-19 role | Dissatisfied with communication from chief dental officer |
| RADFORD, P. & MCKAY, A., 2020 | Dental nurses                                                                   |                                                           |                                                          | Training and CPD                | Recognise their vital role                                    | ‘Referrals made by dentists’, ‘parental pressure’ and ‘demands placed on nurses’ |                                         |                                           |                                                           |
| SAMAT, R. A. et al., 2011     | Dentists, dental nurses, dental technicians, and dental surgery assistants      |                                                           |                                                          |                                 |                                                               | Compromised posture was linked to back pain                                      |                                         |                                           |                                                           |
| SANDHU, B. K. et al., 2021    | Dental nurses, dentists, dental core trainees                                   |                                                           | Isolation from family, but good teamwork during COVID-19 |                                 | New skills, knowledge gained via redeployment during covid-19 | Constantly changing guidance, lack of suitable personal protective equipment     |                                         |                                           |                                                           |
| SCEPANOVIC, D. et al., 2019   | General dentists, dental specialists, dental technicians, and dental assistants | Musculoskeletal pain was more common in women than in men |                                                          |                                 |                                                               |                                                                                  |                                         |                                           |                                                           |

|                                       |                                                                                                              | Micro level factors                                                             |                                                                                     |                                                                         | Meso level factors                                               |                                                                                                                                                     | Macro level factors                                                          |                                                                                     |                                                                                     |
|---------------------------------------|--------------------------------------------------------------------------------------------------------------|---------------------------------------------------------------------------------|-------------------------------------------------------------------------------------|-------------------------------------------------------------------------|------------------------------------------------------------------|-----------------------------------------------------------------------------------------------------------------------------------------------------|------------------------------------------------------------------------------|-------------------------------------------------------------------------------------|-------------------------------------------------------------------------------------|
| Study Author/<br>Date                 | Professional<br>group                                                                                        | Personal<br>Factors                                                             | Professional/<br>Social<br>relationships                                            | Professional<br>Career<br>Level                                         | Job<br>Specification                                             | Workplace<br>Characteristics                                                                                                                        | Dental<br>Healthcare<br>System                                               | Regulation                                                                          | Profession                                                                          |
| TURNER, S. et<br>al., 2012            | Dental nurses                                                                                                |                                                                                 |                                                                                     | CPD<br>increased<br>clinical<br>responsibilities and skills             | Majority felt<br>mandatory<br>CPDs had not<br>influenced<br>role | Feeling<br>respected, more<br>involved, and<br>important due to<br>extended duties                                                                  | Negative<br>financial<br>impact of<br>mandatory<br>registration<br>on career | Registration<br>fee too high<br>Agree with<br>compulsory<br>registration<br>and CPD | Issues with<br>the funding<br>of continuing<br>professional<br>development<br>(CPD) |
| UHLEN, M. et<br>al., 2021             | Dental<br>specialists,<br>general dental<br>practitioners,<br>dental<br>hygienists, and<br>dental assistants | Female<br>participants<br>concerned<br>about<br>Instability<br>and<br>Infection | Socially<br>distanced from<br>family and<br>friends due to<br>job<br>responsibility |                                                                         |                                                                  | Increased work<br>experience was<br>associated with<br>not expressing<br>fear about<br>instability and<br>being infected<br>and infecting<br>others |                                                                              |                                                                                     |                                                                                     |
| UZIEL, N. et<br>al., 2019             | Dental assistants                                                                                            |                                                                                 |                                                                                     |                                                                         |                                                                  | Stress was<br>linked to<br>income,<br>workload, and<br>work hazards                                                                                 |                                                                              |                                                                                     |                                                                                     |
| WANG, Y. et<br>al., 2021              | Dental nurses                                                                                                | Age and<br>exercise<br>linked to<br>work<br>engagement                          |                                                                                     | Higher<br>professional<br>titles linked to<br>higher work<br>engagement |                                                                  |                                                                                                                                                     |                                                                              |                                                                                     |                                                                                     |
| WIJARANAPH<br>ITI, S. et al.,<br>2009 | Dental nurses                                                                                                |                                                                                 | Need to be<br>accepted by<br>society                                                | Desire to<br>reach Self-<br>actualization                               | Stress caused<br>by role<br>conflict                             | Motivation linked<br>to better<br>performance                                                                                                       |                                                                              |                                                                                     |                                                                                     |
| ZHANG, Y et<br>al., 2022              | Dentists and<br>dental nurses                                                                                | Older age<br>was linked<br>to<br>psychologic<br>distress                        |                                                                                     |                                                                         |                                                                  | Low income,<br>burn out, linked<br>to psychological<br>distress                                                                                     |                                                                              |                                                                                     |                                                                                     |
