# Supplementary material for: Key determinants of health and wellbeing of dental nurses: a rapid review of over two decades of research
Source: Research Square preprint supplement (doi:10.21203/rs.3.rs-3792798/v1), 2024-01-09
Supplement: Supplementary file 2 [file 7feaf4ab83975a52a18bcd2a.pdf]

## Appendix

### Appendix 1

#### Search Terms and Inclusion and Exclusion criteria for review of Dental Nurses' Well-being

**Table 1**

| Search Terms for Review of Dental Nurses' Well-being |              |      |                  |                                                                                                                                              |
|------------------------------------------------------|--------------|------|------------------|----------------------------------------------------------------------------------------------------------------------------------------------|
| “AND”                                                | Field        |      |                  | Dentistry OR Dental OR Oral                                                                                                                  |
|                                                      | Target Group |      |                  | “Dental workforce OR Dental nurse* OR Dental Assistant OR Dental care professional* OR Dental staff OR Dental Team”                          |
|                                                      | Impacts      | “OR” | Positive Impacts | “Well-being* OR Wellbeing* OR Wellness OR Good health OR Welfare OR Job retention OR Job motivation OR Job performance OR Work satisfaction” |
|                                                      |              |      | Neutral Impacts  | “Workload OR Job Satisfaction OR Mental health OR Physical health OR Working atmosphere OR Work-life balance OR Job demands”                 |
|                                                      |              |      | Negative Impacts | “Burnout OR Professional stress, Psychological stress OR Occupational stress OR Work stress OR Impact OR Exhaustion OR Depression”           |

Adapted from Salazar et al. (15).

**Table 2**

| Inclusion and exclusion Criteria for the review of Dental Nurses' health and Wellbeing                                                      |                                                  |
|---------------------------------------------------------------------------------------------------------------------------------------------|--------------------------------------------------|
| Inclusion criteria                                                                                                                          | Exclusion criteria                               |
| Systematic reviews                                                                                                                          | Not concerning dental nurses                     |
| Empirical studies                                                                                                                           | Not available in English                         |
| Studies presenting variables impacting well-being, Workplace happiness, dental workforce job retention, burnout, stress, drive, and morale. | Not available in full text<br>Secondary research |

Adapted from Salazar et al. (15).
